# Supplementary material
Source: PubMed Central journal article supplement (PMC2799792)
Supplement: 0907665106_0907665106SI.pdf [file 0907665106_0907665106SI.pdf]

# Supporting Information

Haglund et al. 10.1073/pnas.0907665106

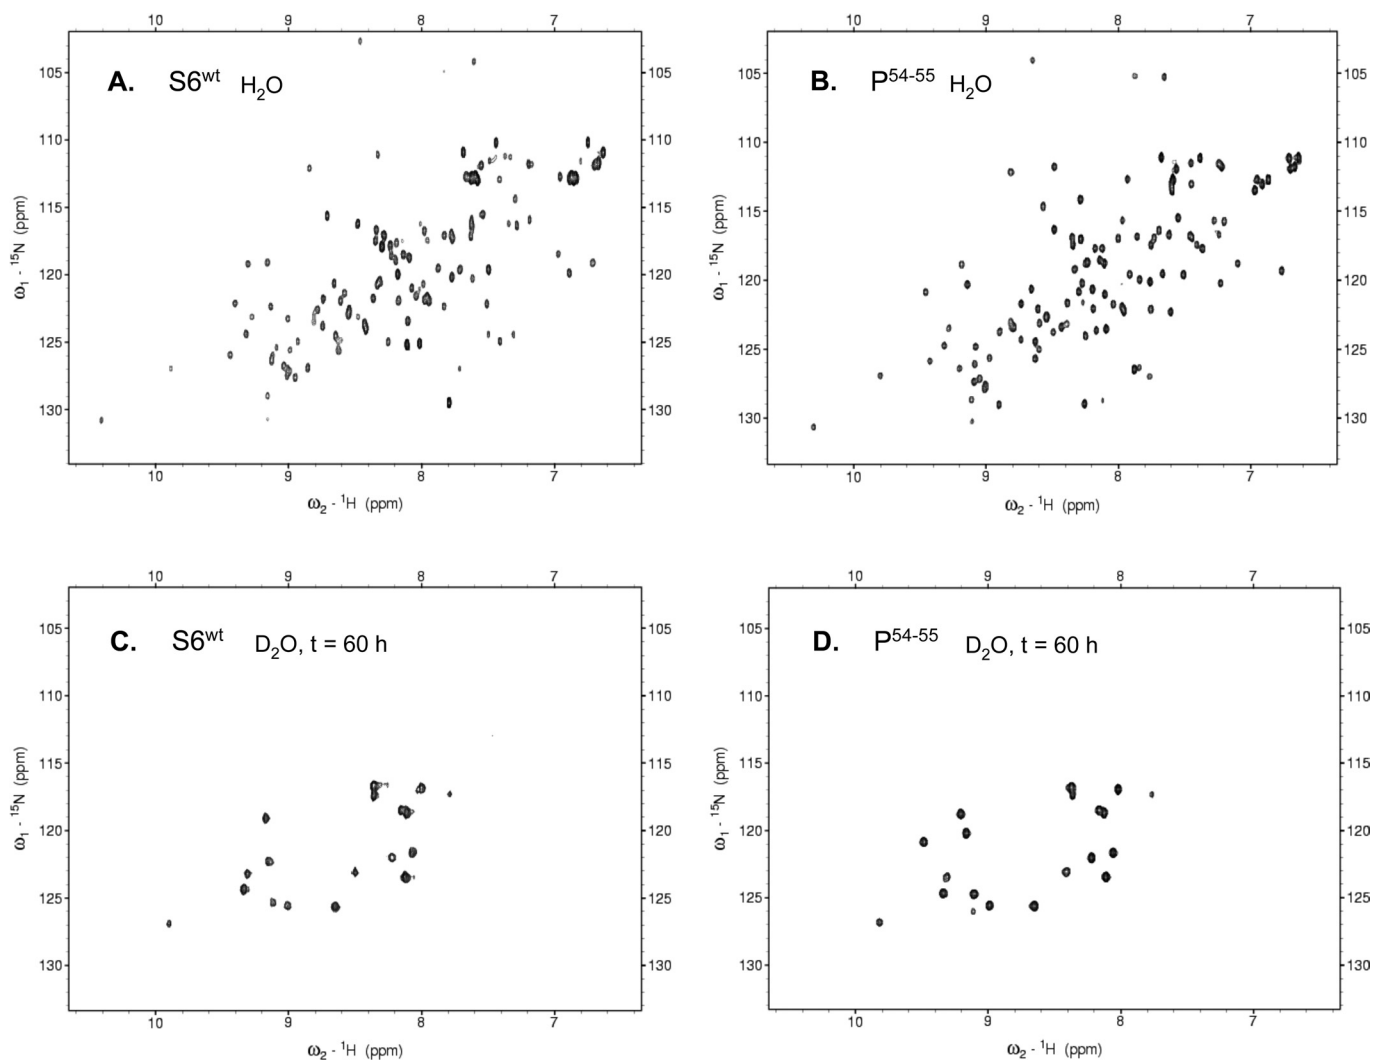

**Fig. S1.** HSQC spectra of S6<sup>wt</sup> and P<sup>54-55</sup>, before and after 60 h of exchange in D<sub>2</sub>O. (A) S6<sup>wt</sup> in H<sub>2</sub>O. (B) P<sup>54-55</sup> in H<sub>2</sub>O. (C) S6<sup>wt</sup> after 60-h incubation in D<sub>2</sub>O. (D) P<sup>54-55</sup> after 60-h incubation in D<sub>2</sub>O.



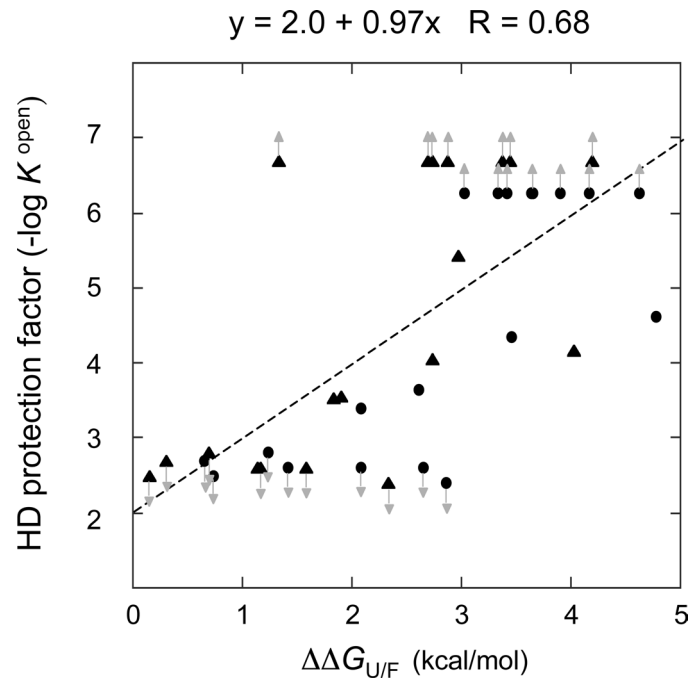

**Fig. S3.** Plot of HD protection factors (Table 1) vs. local stability ( $\Delta\Delta G_{U/F}$ , Table S2) as estimated from the stability loss upon point mutation to Ala. The correlation  $R = 0.68$  is obtained by fitting to the entire dataset, including the points at the thresholds for global (arrow up) and dead-time exchange (arrow down).

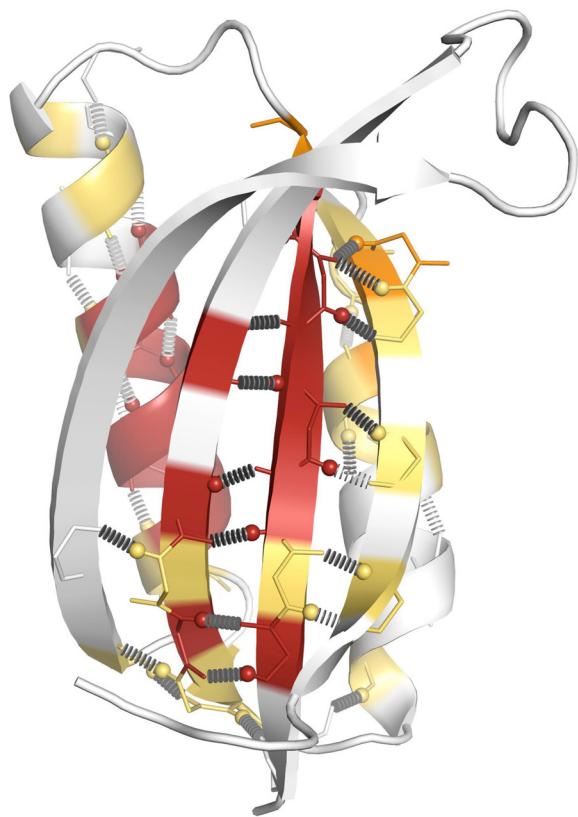**S6<sup>wt</sup>**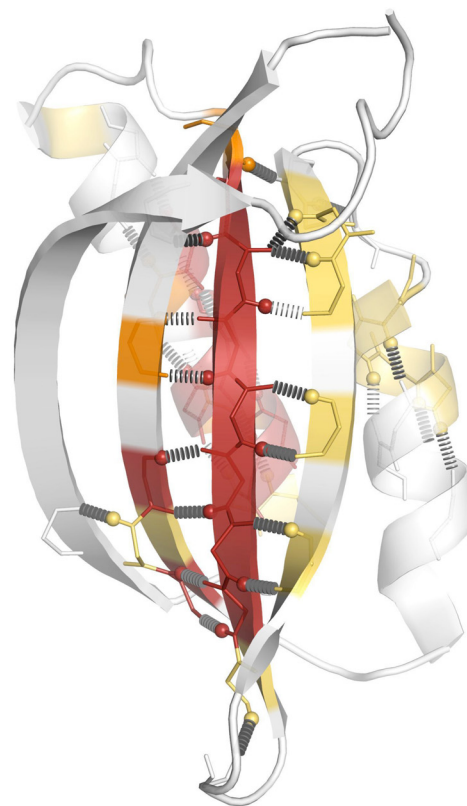**P<sup>54-55</sup>**

**Movie S1.** Video showing the HD-exchange patterns of S6<sup>wt</sup> and P<sup>54-55</sup> (Fig. 4 in main text). The protection factors of S6<sup>wt</sup> and P<sup>54-55</sup> are overall very similar and do not respond to the changes in folding pathway induced by circular permutation. The backbone positions are color-coded according to the protection factors (PF) in Fig. S3.

[Movie S1 \(AVI\)](#)

Table S1. NOE factors for S6<sup>wt</sup> and the permutant P54-55

| S6 <sup>wt</sup> |       |       | P54-55            |       |       |
|------------------|-------|-------|-------------------|-------|-------|
| Amino acid       | NOE   | Error | Amino acid        | NOE   | Error |
| M1               |       |       | M1 <sub>1</sub>   |       |       |
| R2               | 0.59  | 0.04  | R2 <sub>44</sub>  |       |       |
| R3               | 0.53  | 0.02  | R3 <sub>45</sub>  | 0.73  | 0.01  |
| Y4               | 0.83  | 0.03  | Y4 <sub>46</sub>  | 0.80  | 0.02  |
| Q5               | 0.77  | 0.02  | Q5 <sub>47</sub>  | 0.80  | 0.02  |
| V6               | 0.67  | 0.03  | V6 <sub>48</sub>  | 0.76  | 0.02  |
| N7               | 0.77  | 0.02  | N7 <sub>49</sub>  | 0.82  | 0.02  |
| I8               | 0.94  | 0.02  | I8 <sub>50</sub>  | 0.78  | 0.02  |
| V9               | 0.85  | 0.03  | V9 <sub>51</sub>  | 0.79  | 0.02  |
| L10              | 0.77  | 0.03  | L10 <sub>52</sub> | 0.81  | 0.02  |
| N11              |       |       | N11 <sub>53</sub> |       |       |
| P12              |       |       | P12 <sub>54</sub> |       |       |
| N13              |       |       | N13 <sub>55</sub> |       |       |
| L14              | 0.66  | 0.02  | L14 <sub>56</sub> | 0.68  | 0.01  |
| D15              | 0.73  | 0.02  | D15 <sub>57</sub> | 0.75  | 0.01  |
| Q16              | 0.76  | 0.02  | Q16 <sub>58</sub> | 0.76  | 0.01  |
| S17              | 0.78  | 0.01  | S17 <sub>59</sub> | 0.78  | 0.01  |
| Q18              | 0.65  | 0.02  | Q18 <sub>60</sub> | 0.80  | 0.01  |
| L19              | 0.81  | 0.02  | L19 <sub>61</sub> | 0.79  | 0.01  |
| A20              | 0.83  | 0.02  | A20 <sub>62</sub> | 0.80  | 0.01  |
| L21              | 0.83  | 0.01  | L21 <sub>63</sub> | 0.83  | 0.01  |
| E22              | 0.71  | 0.02  | E22 <sub>64</sub> | 0.79  | 0.01  |
| K23              | 0.95  | 0.02  | K23 <sub>65</sub> | 0.82  | 0.01  |
| E24              |       |       | E24 <sub>66</sub> | 0.25  | 0.01  |
| I25              | 0.87  | 0.02  | I25 <sub>67</sub> | 0.84  | 0.01  |
| I26              | 0.73  | 0.02  | I26 <sub>68</sub> | 0.82  | 0.02  |
| Q27              |       |       | Q27 <sub>69</sub> | 0.84  | 0.01  |
| R28              |       |       | R28 <sub>70</sub> | 0.82  | 0.01  |
| A29              | 0.74  | 0.01  | A29 <sub>71</sub> | 0.81  | 0.01  |
| L30              | 0.86  | 0.02  | L30 <sub>72</sub> | 0.80  | 0.02  |
| Q31              | 0.77  | 0.02  | Q31 <sub>73</sub> | 0.82  | 0.01  |
| N32              | 0.59  | 0.01  | N32 <sub>74</sub> | 0.76  | 0.01  |
| Y33              | 0.77  | 0.02  | Y33 <sub>75</sub> | 0.78  | 0.02  |
| G34              | 0.76  | 0.02  | G34 <sub>76</sub> | 0.79  | 0.02  |
| A35              | 0.76  | 0.01  | A35 <sub>77</sub> | 0.74  | 0.01  |
| R36              | 0.73  | 0.02  | R36 <sub>78</sub> | 0.71  | 0.02  |
| V37              | 0.79  | 0.02  | V37 <sub>79</sub> |       |       |
| E38              | 0.78  | 0.03  | E38 <sub>80</sub> | 0.79  | 0.02  |
| K39              | 0.76  | 0.02  | K39 <sub>81</sub> | 0.74  | 0.02  |
| V40              | 0.52  | 0.02  | V40 <sub>82</sub> | 0.55  | 0.02  |
| E41              | 0.84  | 0.03  | E41 <sub>83</sub> | 0.80  | 0.02  |
| E42              | 0.71  | 0.02  | E42 <sub>84</sub> |       |       |
| L43              | 0.63  | 0.03  | L43 <sub>85</sub> | 0.77  | 0.03  |
| G44              | 0.64  | 0.03  | G44 <sub>86</sub> | 0.71  | 0.02  |
| L45              |       |       | L45 <sub>87</sub> |       |       |
| R46              | 0.74  | 0.03  | R46 <sub>88</sub> | 0.78  | 0.03  |
| R47              | 0.69  | 0.02  | R47 <sub>89</sub> | 0.72  | 0.02  |
| L48              | 0.57  | 0.03  | L48 <sub>90</sub> | 0.57  | 0.02  |
| A49              | 0.04  | 0.02  | A49 <sub>91</sub> | 0.16  | 0.01  |
| Y50              |       |       | Y50 <sub>92</sub> |       |       |
| P51              |       |       | P51 <sub>93</sub> |       |       |
| I52              |       |       | I52 <sub>94</sub> |       |       |
| A53              | -0.50 | 0.04  | A53 <sub>95</sub> | -6.47 | 0.08  |
| L54              | -0.40 | 0.04  | L54 <sub>96</sub> | -2.22 | 0.02  |
| D55              |       |       | D55 <sub>2</sub>  | -0.27 | 0.00  |
| P56              |       |       | P56 <sub>3</sub>  |       |       |
| Q57              | 0.35  | 0.02  | Q57 <sub>4</sub>  | 0.62  | 0.03  |
| G58              | 0.77  | 0.03  | G58 <sub>5</sub>  | 0.72  | 0.03  |
| Y59              | 0.78  | 0.03  | Y59 <sub>6</sub>  | 0.82  | 0.03  |
| F60              | 0.85  | 0.03  | F60 <sub>7</sub>  | 0.79  | 0.03  |
| L61              | 0.72  | 0.03  | L61 <sub>8</sub>  | 0.79  | 0.03  |
| W62              | 0.72  | 0.02  | W62 <sub>9</sub>  | 0.75  | 0.02  |

S6<sup>wt</sup>

p54-55

| Amino acid | NOE   | Error | Amino acid         | NOE  | Error |
|------------|-------|-------|--------------------|------|-------|
| Y63        |       |       | Y63 <sub>10</sub>  | 0.79 | 0.02  |
| Q64        |       |       | Q64 <sub>11</sub>  |      |       |
| V65        | 0.84  | 0.02  | V65 <sub>12</sub>  | 0.79 | 0.02  |
| E66        | 0.76  | 0.02  | E66 <sub>13</sub>  | 0.85 | 0.02  |
| M67        | 0.78  | 0.02  | M67 <sub>14</sub>  | 0.81 | 0.02  |
| P68        |       |       | P68 <sub>15</sub>  |      |       |
| E69        | 0.75  | 0.03  | E69 <sub>16</sub>  | 0.73 | 0.02  |
| D70        | 0.83  | 0.01  | D70 <sub>17</sub>  | 0.75 | 0.01  |
| R71        | 0.70  | 0.02  | R71 <sub>18</sub>  | 0.71 | 0.02  |
| V72        | 0.74  | 0.02  | V72 <sub>19</sub>  | 0.82 | 0.01  |
| N73        | 0.81  | 0.02  | N73 <sub>20</sub>  | 0.81 | 0.02  |
| D74        |       |       | D74 <sub>21</sub>  | 0.15 | 0.00  |
| L75        | 0.76  | 0.02  | L75 <sub>22</sub>  | 0.84 | 0.01  |
| A76        | 0.95  | 0.02  | A76 <sub>23</sub>  | 0.76 | 0.01  |
| R77        | 0.77  | 0.01  | R77 <sub>24</sub>  | 0.81 | 0.01  |
| E78        | 0.86  | 0.02  | E78 <sub>25</sub>  | 0.80 | 0.02  |
| L79        | 0.81  | 0.02  | L79 <sub>26</sub>  | 0.77 | 0.02  |
| R80        | 0.77  | 0.02  | R80 <sub>27</sub>  | 0.78 | 0.01  |
| I81        |       |       | I81 <sub>28</sub>  | 0.78 | 0.02  |
| R82        | 0.73  | 0.02  | R82 <sub>29</sub>  | 0.76 | 0.02  |
| D83        | 0.75  | 0.02  | D83 <sub>30</sub>  | 0.83 | 0.01  |
| N84        | 0.77  | 0.02  | N84 <sub>31</sub>  | 0.82 | 0.02  |
| V85        | 0.79  | 0.02  | V85 <sub>32</sub>  | 0.79 | 0.02  |
| R86        | 0.78  | 0.03  | R86 <sub>33</sub>  | 0.82 | 0.03  |
| R87        | 0.70  | 0.02  | R87 <sub>34</sub>  | 0.81 | 0.02  |
| V88        | 0.84  | 0.02  | V88 <sub>35</sub>  | 0.80 | 0.02  |
| M89        | 0.76  | 0.02  | M89 <sub>36</sub>  |      |       |
| V90        | 0.79  | 0.02  | V90 <sub>37</sub>  |      |       |
| V91        | 0.75  | 0.03  | V91 <sub>38</sub>  | 0.73 | 0.03  |
| K92        | 0.76  | 0.02  | K92 <sub>A39</sub> | 0.73 | 0.02  |
| S93        | 0.80  | 0.02  | S93 <sub>40</sub>  | 0.71 | 0.02  |
| Q94        | 0.56  | 0.02  | Q94 <sub>T41</sub> | 0.66 | 0.01  |
| E95        | 0.19  | 0.02  | E95 <sub>T42</sub> | 0.71 | 0.01  |
| P96        |       |       | P96 <sub>43</sub>  |      |       |
| F97        | -0.06 | 0.02  | F97                | 0.72 | 0.01  |
| L98        | -0.66 | 0.01  | L98                |      |       |
| A99        |       |       | A99                |      |       |
| N100       |       |       | N100               |      |       |
| A101       |       |       | A101               |      |       |

The residues are labeled according to the S6<sup>wt</sup> sequence and subscripts refer to P<sup>54-55</sup> numbering.

**Table S2.  $\phi$  values and free-energy changes upon point mutation ( $\Delta \Delta G_{U/F}$ ) for S6<sup>wt</sup> and P<sup>54-55</sup>**

| Mutation           | S6 <sup>wt</sup> $\phi$ | S6 <sup>wt</sup> $\Delta \Delta G_{U/F}$ | P <sup>54-55</sup> $\phi$ | P <sup>54-55</sup> $\Delta \Delta G_{U/F}$ |
|--------------------|-------------------------|------------------------------------------|---------------------------|--------------------------------------------|
| V6A <sub>48</sub>  | 0.51 <sup>1*</sup>      | 3.64                                     | 0.57*                     | 3.38                                       |
| I8A <sub>50</sub>  | 0.45*                   | 4.17                                     | 0.40*                     | 3.44                                       |
| L10A <sub>52</sub> | 0.32                    | 4.62                                     | 0.18                      | 4.20                                       |
| L19A <sub>61</sub> | 0.25                    | 2.61                                     | 0.05                      | 1.90                                       |
| I26A <sub>68</sub> | 0.40*                   | 3.03                                     | 0.23                      | 1.33                                       |
| L30A <sub>72</sub> | 0.34                    | 3.66                                     | 0.14                      | 2.87                                       |
| V37A <sub>79</sub> | 0.27                    | 2.66                                     | 0.07                      | 1.17                                       |
| V40A <sub>82</sub> | —                       | 0.74                                     | —                         | 0.16                                       |
| L48A <sub>90</sub> | —                       | 0.65                                     | —                         | 0.30                                       |
| F60A <sub>7</sub>  | —                       | 1.23                                     | —                         | 0.69                                       |
| L61A <sub>8</sub>  | 0.25                    | 3.42                                     | 0.08                      | 2.97                                       |
| Y63A <sub>10</sub> | 0.21                    | 3.91                                     | 0.10                      | 2.69                                       |
| V65A <sub>12</sub> | 0.38                    | 3.33                                     | 0.17                      | 2.74                                       |
| V72A <sub>19</sub> | 0.17                    | 1.42                                     | 0.00                      | 1.14                                       |
| L75A <sub>22</sub> | 0.41*                   | 2.08                                     | 0.51*                     | 1.83                                       |
| L79A <sub>26</sub> | 0.17                    | 4.78                                     | 0.23                      | 4.03                                       |
| V85A <sub>32</sub> | 0.08                    | 3.46                                     | 0.15                      | 2.74                                       |
| V88A <sub>35</sub> | 0.15                    | 2.09                                     | 0.61*                     | 1.59                                       |
| V90A <sub>37</sub> | 0.16                    | 2.86                                     | 0.56*                     | 2.33                                       |

Adapted from data in ref. 1. Subscripts refer to P<sup>54-55</sup> numbering.

\*The positions with  $f > 0.4$  are shown in Fig. 1.

1. Haglund E, Lindberg MO, Oliveberg M (2008) Changes of protein folding pathways by circular permutation. Overlapping nuclei promote global cooperativity *J Biol Chem* 283:27904–27915.
